# Supplementary material for: Epigenetically regulated Fibronectin leucine rich transmembrane protein 2 (FLRT2) shows tumor suppressor activity in breast cancer cells
Source: PubMed Central journal article supplement (PMC5428463; doi:10.1038/s41598-017-00424-0), 2017-03-21

**Epigenetically regulated Fibronectin leucine rich transmembrane  
protein 2 (FLRT2) shows tumor suppressor activity in breast  
cancer cells**

Hansol Bae, Byungtak Kim, Hyunkyung Lee, Seungyeon Lee, Han-Sung Kang, and Sun Jung  
Kim

**Supporting Information**

**Table S1. Public methylation microarray data of breast tissues adopted in this study**

---

|                                                                                                                                                                                                                                                                                                                                                                           |            |                                                                                                                                                                                                                                                                                                                                                                                                                                                        |
|---------------------------------------------------------------------------------------------------------------------------------------------------------------------------------------------------------------------------------------------------------------------------------------------------------------------------------------------------------------------------|------------|--------------------------------------------------------------------------------------------------------------------------------------------------------------------------------------------------------------------------------------------------------------------------------------------------------------------------------------------------------------------------------------------------------------------------------------------------------|
| <b>Normal (N=33)</b>                                                                                                                                                                                                                                                                                                                                                      |            |                                                                                                                                                                                                                                                                                                                                                                                                                                                        |
| GSM801711, GSM801719, GSM801720, GSM801721, GSM801722, GSM801742, GSM801747, GSM801754, GSM801758, GSM801772, GSM801789, GSM801795, GSM801815, GSM801816, GSM801817, GSM801821, GSM801822, GSM801824, GSM801827, GSM801832, GSM801834, GSM819045, GSM819047, GSM819049, GSM819051, GSM553865, GSM553866, GSM553867, GSM553868, GSM553869, GSM553870, GSM553871, GSM553872 |            |                                                                                                                                                                                                                                                                                                                                                                                                                                                        |
| <hr/>                                                                                                                                                                                                                                                                                                                                                                     |            |                                                                                                                                                                                                                                                                                                                                                                                                                                                        |
| <b>Cancer (N=112)</b>                                                                                                                                                                                                                                                                                                                                                     |            |                                                                                                                                                                                                                                                                                                                                                                                                                                                        |
| <b>Grade I<br/>(N=34)</b>                                                                                                                                                                                                                                                                                                                                                 | <b>ER+</b> | GSM801706, GSM801707, GSM801708, GSM801709, GSM801713, GSM801723, GSM801724, GSM801727, GSM801733, GSM801737, GSM801739, GSM801745, GSM801749, GSM801752, GSM801755, GSM801759, GSM801760, GSM801762, GSM801773, GSM801775, GSM801776, GSM801781, GSM801794, GSM801810, GSM801811, GSM801829, GSM801838, GSM801839, GSM80184                                                                                                                           |
|                                                                                                                                                                                                                                                                                                                                                                           | <b>ER-</b> | GSM801734, GSM801753, GSM801766, GSM801768, GSM801771                                                                                                                                                                                                                                                                                                                                                                                                  |
| <b>Grade II<br/>(N=59)</b>                                                                                                                                                                                                                                                                                                                                                | <b>ER+</b> | GSM801712, GSM801714, GSM801715, GSM801726, GSM801730, GSM801732, GSM801736, GSM801738, GSM801741, GSM801743, GSM801746, GSM801756, GSM801761, GSM801763, GSM801764, GSM801769, GSM801770, GSM801777, GSM801779, GSM801782, GSM801786, GSM801788, GSM801790, GSM801791, GSM801798, GSM801800, GSM801803, GSM801804, GSM801805, GSM801807, GSM801812, GSM801813, GSM801818, GSM801819, GSM801823, GSM801825, GSM801826, GSM801828, GSM801830, GSM801835 |
|                                                                                                                                                                                                                                                                                                                                                                           | <b>ER-</b> | GSM801725, GSM801728, GSM801729, GSM801746, GSM801748, GSM801774, GSM801780, GSM801783, GSM801785, GSM801787, GSM801792, GSM801796, GSM801797, GSM801799, GSM801801, GSM801808, GSM801809, GSM801814, GSM801836, GSM801837                                                                                                                                                                                                                             |
| <b>Grade III<br/>(N=19)</b>                                                                                                                                                                                                                                                                                                                                               | <b>ER+</b> | GSM801717, GSM801765, GSM801802, GSM801820, GSM801833, GSM801842                                                                                                                                                                                                                                                                                                                                                                                       |
|                                                                                                                                                                                                                                                                                                                                                                           | <b>ER-</b> | GSM801710, GSM801716, GSM801735, GSM801740, GSM801744, GSM801751, GSM801757, GSM801767, GSM801778, GSM801784, GSM801806, GSM801831, GSM801841                                                                                                                                                                                                                                                                                                          |

---

**Table S2. Public expression microarray data of breast cancer cell lines adopted in this study**

| Cell type  | GEO database ID                    |
|------------|------------------------------------|
| MCF-10A    | GSM1017484, GSM1017485, GSM1017486 |
| MDA-MB-231 | GSM1017490, GSM1017491, GSM1017492 |
| T-47D      | GSM1017511, GSM1017512, GSM1017513 |
| MCF-7      | GSM1017487, GSM1017488, GSM1017489 |

**Table S3. Sequences of primers applied in this study**

| Genes                   | Forward primer (5'→3')    | Reverse primer (5'→3')     |
|-------------------------|---------------------------|----------------------------|
| <b>MSP<sup>a</sup></b>  |                           |                            |
| FLRT2 M                 | TCGTTGGTAATTTTAATAAATTCGG | AAACGAAAACCTTTATTCACGTACGT |
| FLRT2 U                 | TTGTTGGTAATTTTAATAAATTTGG | AACAAAAACCTTTATTCACATACATT |
| <b>Real-time RT-PCR</b> |                           |                            |
| GAPDH                   | CAGGAGGCATTGCTGATGAT      | GAAGGCTGGGGCTCATT          |
| FLRT2                   | ACCCTGGTTTTGTGACTGC       | AGGACCTTGGCACATGAAAC       |
| SFRP1                   | CAAGCCCCAAGGCACAAC        | TCATCCTCAGTGCAAACCTCG      |
| CCND2                   | CACCTGGATGCTGGAGGTC       | GAGGCCAGGAACATGCAGA        |
| FBN2                    | TGGACTAACAATTCTGAACCAGAC  | CAACATCTATAACAATCTCCATTTGC |
| BCAN                    | CGGATCAGACCGTGAGGTAT      | GTTCTCCATTTAGGTCTTCAGCA    |
| PLSCR4                  | TACCAGGACCCCTGGAAC        | GGCTGGTACAAAGGGAAGGT       |
| GIPC2                   | GGTCAAAGGCTGGAAAGTCA      | TTTCAGAAGGCATTTCTTCCA      |
| LCAT                    | TACTATCACTGGGCGCTGTC      | GTCACCCCACTCCTTCTCAG       |
| APCDD1                  | CAGGCTGTGAAGTAAGGTCAGG    | TTGCTGCCATAATAAAAATTGG     |
| FBN1                    | TGGGGAGTGTATTGATGTTGA     | AATGTCTCGGCATTCTGTCC       |
| PLD5                    | AGCACAAGCACCAAAAAGGAC     | GCAGTTGGCTATTTTCAGTGC      |

<sup>a</sup>M, methylated sequence; U, unmethylated sequence.

**Figure S1. RT-PCR analysis of FLRT2 in normal and cancerous tissue of the breast.**

Expression of FLRT2 was examined by real-time RT-PCR for 20 pairs of tumor tissue and nearby normal tissue. Each sample was analyzed twice, and average relative expression levels were plotted.

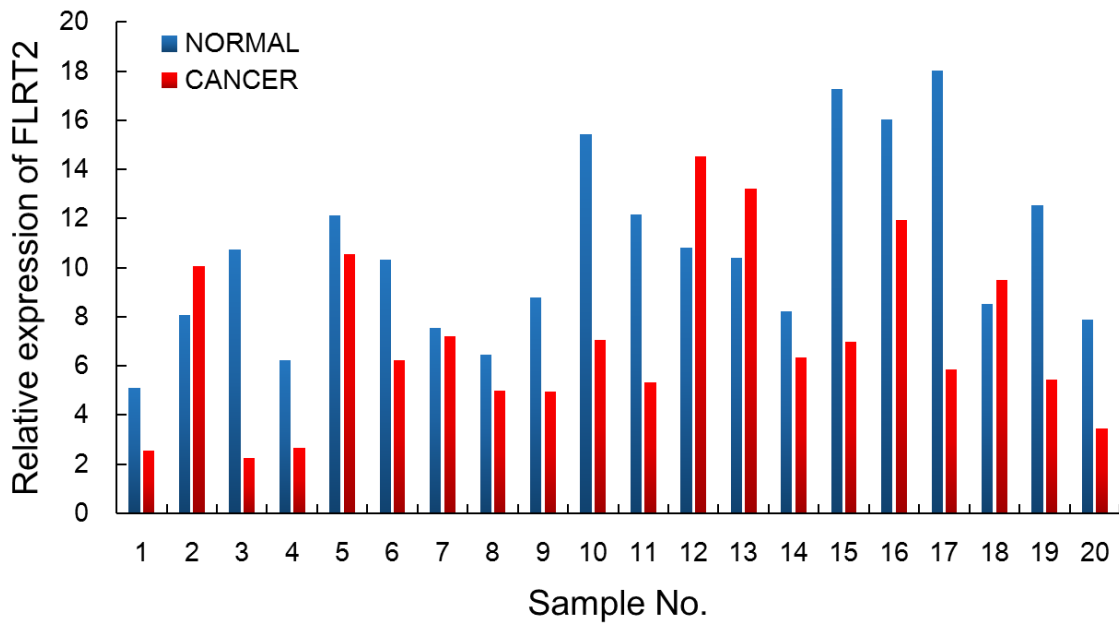

**Figure S2. Kaplan-Meier survival analysis of FLRT2 expression in breast cancer patients.** Samples from GOBO database (<http://co.bmc.lu.se/gobo>) were stratified into tertiles based on FLRT2 expression level. The log-rank test was performed in all tumor samples, as well as in different tumor subtypes, using distant metastasis-free survival (DMFS) as the endpoint. Higher FLRT2 expression is significantly associated with increased DMFS in all tumors, ER+, luminal A, and lymph node negative tissue.

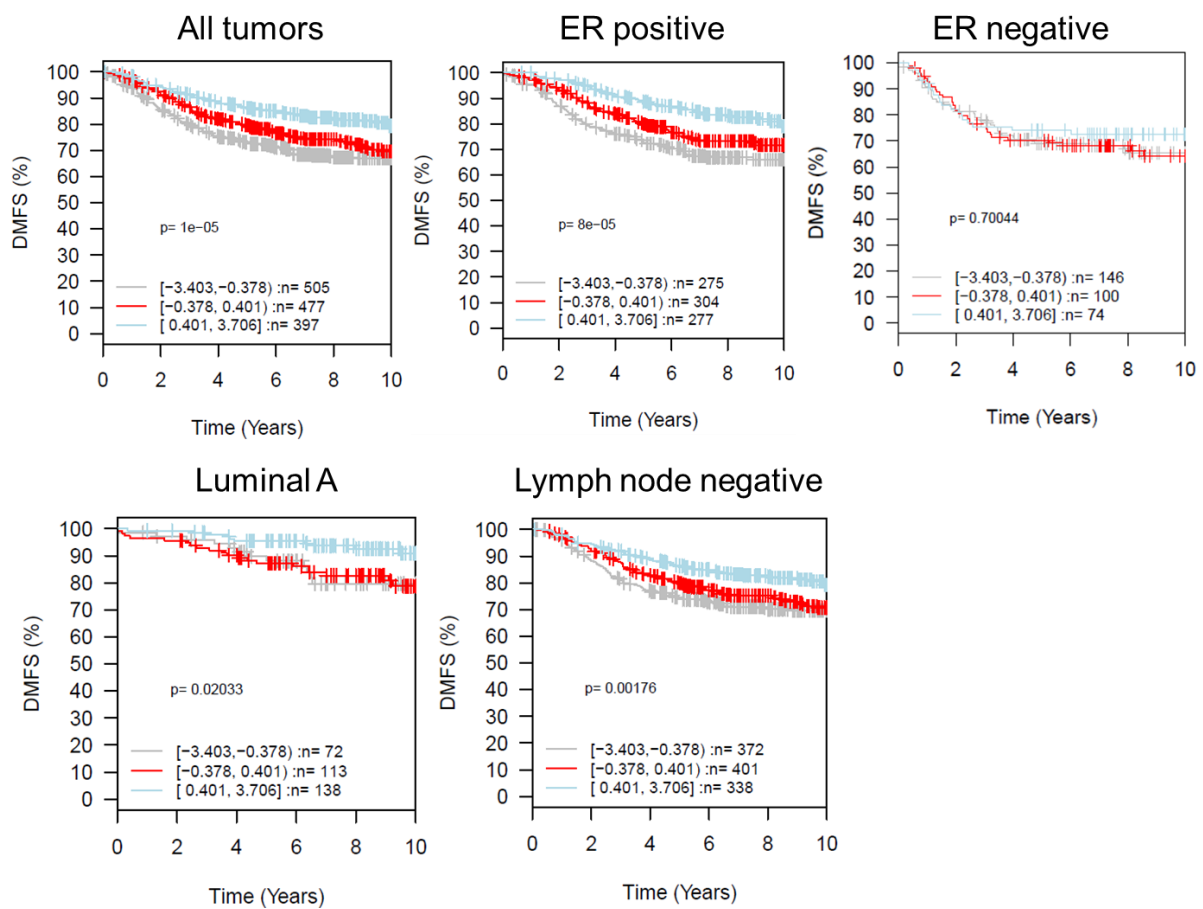

**Figure S3. RT-PCR analysis of FLRT2 after inducing downregulation and overexpression in cell lines.** Overexpression (A) and downregulation (B) of FLRT2 was induced in MCF-7 and MCF-10A, respectively, and assessed by real-time RT-PCR. All experiments were performed at least three times, and the results are shown as the mean with standard errors. Control: control plasmid vector in A and control siRNA in B.

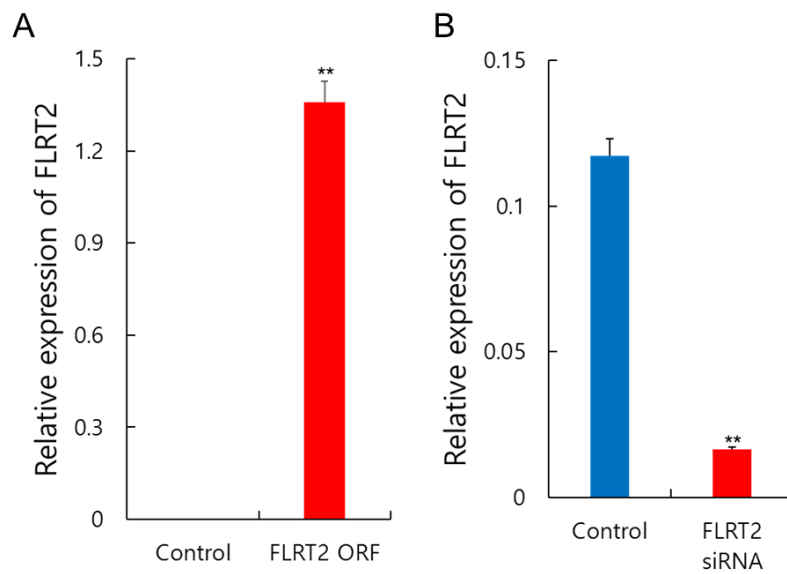

Supplement: 41598_2017_424_MOESM1_ESM.pdf [file 41598_2017_424_MOESM1_ESM.pdf]
